# Supplementary material for: Early response by MR imaging and ultrasound as predictor of pathologic complete response to 12‐week neoadjuvant therapy for different early breast cancer subtypes: Combined analysis from the WSG ADAPT subtrials
Source: PubMed Central journal article supplement — Int J Cancer. 2021 Feb 11;148(10):2614–27. doi: 10.1002/ijc.33495 (PMC8048810; doi:10.1002/ijc.33495), 2021-02-11
Supplement: IJC-148-2614-s001.pdf [file IJC-148-2614-s001.pdf]

## Supplementary Material

### **Early Response by MR Imaging and Ultrasound as Predictor of Pathologic Complete Response to 12-Week Neoadjuvant Therapy for Different Early Breast Cancer Subtypes: Combined Analysis from the WSG ADAPT Subtrials.**

Monika Graeser\*, Simone Schradling\*, Oleg Gluz, Kevin Strobel, Rachel Würstlein, Sherko Kümmel, Claudia Schumacher, Eva-Maria Grischke, Helmut Forstbauer, Michael Braun, Matthias Christgen, Jascha Adams, Henrik Nitzsche, Marianne Just, Hans Holger Fischer, Bahriye Aktas, Jochem Potenberg, Raquel von Schumann, Cornelia Kolberg-Liedtke, Nadia Harbeck, Christiane K. Kuhl, Ulrike Nitz

\*These authors contributed equally to the manuscript.

**Supplementary Figure 1:** Design of the West German Study Group umbrella trial ADAPT

**Supplementary Figure 2:** A true-negative case of magnetic resonance imaging (MRI) predicting a pathological complete response (pCR)

**Supplementary Figure 3:** A true-positive case of magnetic resonance imaging (MRI) predicting a pathological complete response (pCR)

**Supplementary Table 1:** Rates of pCR and Ki-67 response in patients with ECR in the MRI and US group

**Supplementary Table 2:** Area under curve, sensitivity and specificity for combined assessments relative to US

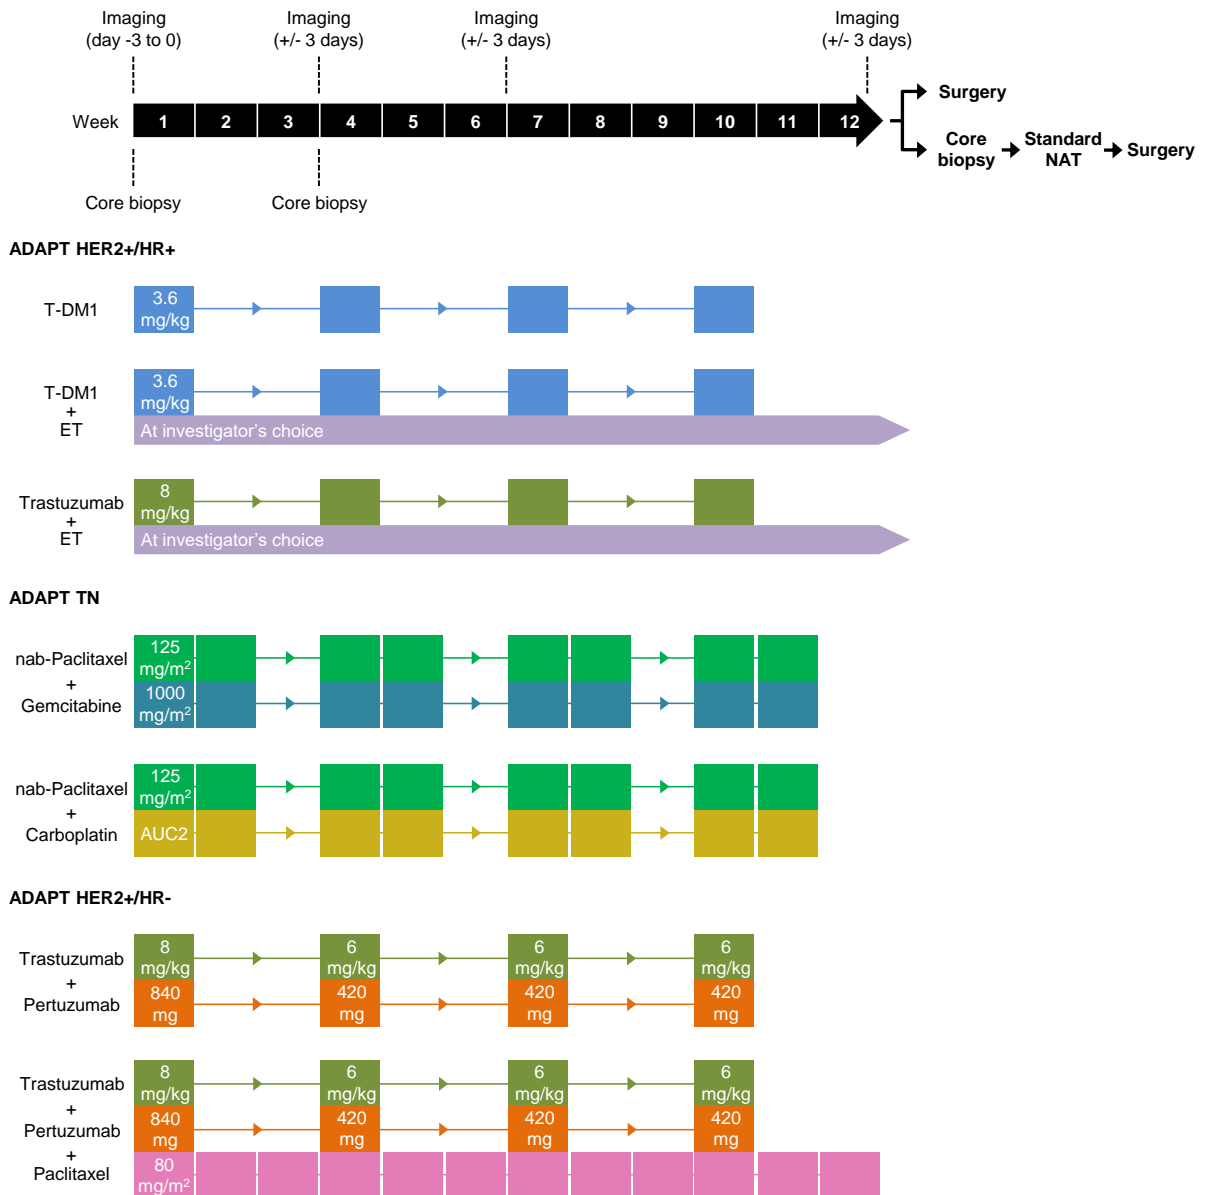

**Supplementary Figure 1:** Design of the West German Study Group umbrella trial ADAPT (Adjuvant Dynamic Marker-adjusted Personalized Therapy Trial Optimizing Risk assessment and Therapy Response Prediction in Early Breast Cancer). Treatment details for ADAPT HER2+/HR+, ADAPT TN and ADAPT HER2+/HR- substudies are shown. EOT, end of treatment; ET, endocrine therapy; pCR, pathological complete response; Standard NAT, neoadjuvant therapy according to national guidelines; T-DM1, trastuzumab emtansine.

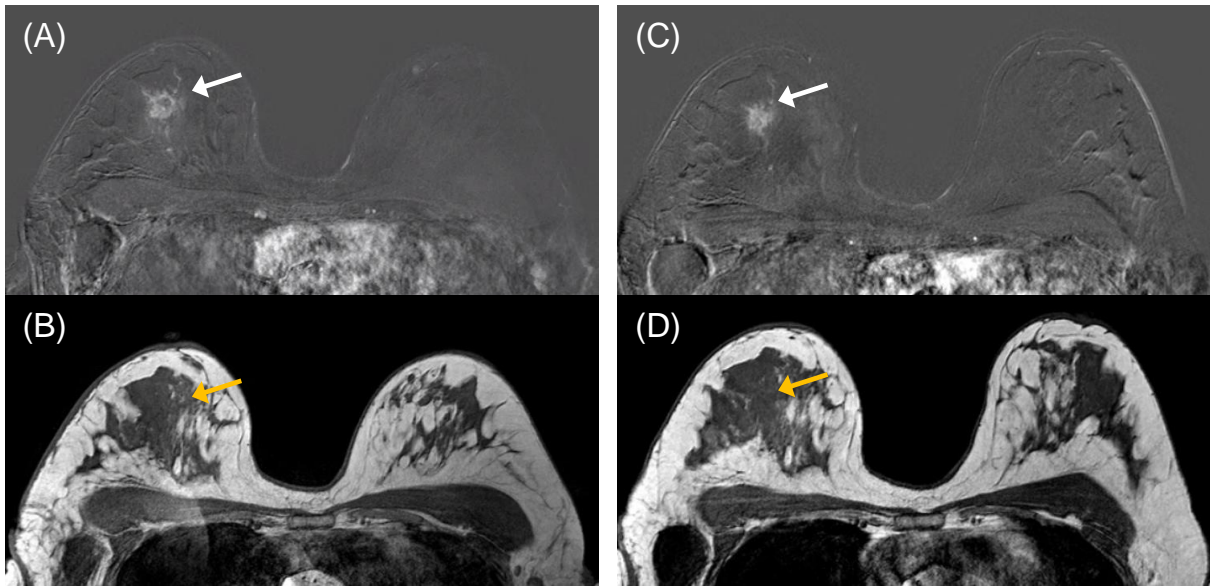

**Supplementary Figure 2: A true-negative case of magnetic resonance imaging (MRI) predicting a pathological complete response (pCR).** 54 years old patient with biopsy proven invasive HR-/HER2- cancer (cT2, cN0, cM0, grade 3). (A) and (B) Baseline MRI prior to neoadjuvant chemotherapy showed a round, irregular mass with a strong enhancement and inhomogeneous internal structure in the upper central right breast (arrow). (C) and (D) MRI 3 weeks after start of neoadjuvant nab-paclitaxel + gemcitabine showed an almost a stable lesion with no significant reduction in size and enhancement compared to baseline. Final histology after surgery revealed a non-pCR. (A) and (C) axial subtraction of the first post contrast series; (B) and (D) axial T1 gradient echo before contrast.

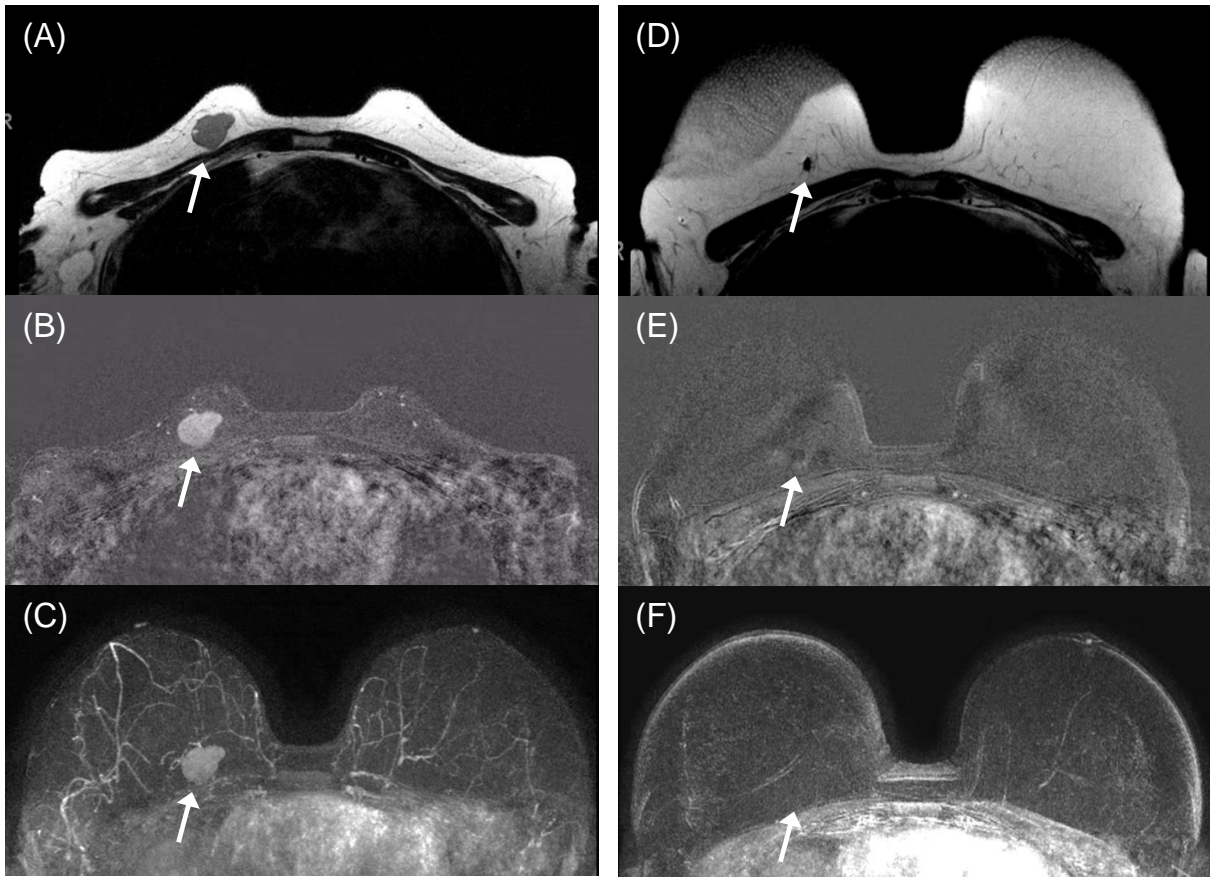

**Supplementary Figure 3: A true-positive case of magnetic resonance imaging (MRI) predicting a pathological complete response (pCR).** 56 years old patient with biopsy proven invasive HR-/HER2- cancer (cT2, cN0, cM0, Grade 2). (A), (B) and (C) baseline MRI prior to neoadjuvant chemotherapy showed a strong enhancing oval mass with smooth border and inhomogeneous internal structure in the upper inner right breast (arrow). Axial T2-weighted turbo spin echo (TSE) sequence showed a relatively hyperintense cancer (A). (D), (E) and (F) MRI 3 weeks after start of neoadjuvant nab-paclitaxel + gemcitabine showed a partial response with a significant reduction of size and enhancement of the invasive cancer in the upper inner quadrant of the right breast (arrow). Also the tumor size in T2-weighted images was significantly reduced compared to the baseline with only a 8 mm hypointense residual at the cancer side (D). Final histology after surgery revealed a pCR. (A) and (D) axial T2-weighted turbo spin echo sequence; (B) and (E) axial early T1 gradient echo sequence after contrast application; (C) and (F) axial maximum intensity projection of the first post contrast subtraction sequence.

**Supplementary Table 1: Rates of pCR and Ki-67 response in patients with ECR in the MRI and US group**

| pCR              | MRI           |               | US            |               | Ki-67 response            | MRI           |               | US            |               |
|------------------|---------------|---------------|---------------|---------------|---------------------------|---------------|---------------|---------------|---------------|
|                  | ECR           | No ECR        | ECR           | No ECR        |                           | ECR           | No ECR        | ECR           | No ECR        |
| <b>Overall</b>   |               |               |               |               |                           |               |               |               |               |
| <b>pCR*</b>      | 28<br>(43.75) | 9<br>(20.93)  | 20<br>(52.63) | 17<br>(24.64) | <b>Ki-67 response*</b>    | 36<br>(56.25) | 23<br>(53.49) | 25<br>(65.79) | 34<br>(49.28) |
| <b>No pCR*</b>   | 35<br>(54.69) | 33<br>(76.74) | 17<br>(44.74) | 51<br>(73.91) | <b>No Ki-67 response*</b> | 12<br>(18.75) | 15<br>(34.88) | 7<br>(18.42)  | 20<br>(28.99) |
| <b>Missing*</b>  | 1<br>(1.56)   | 1<br>(2.33)   | 1<br>(2.63)   | 1<br>(1.45)   | <b>Missing*</b>           | 16<br>(25.00) | 5<br>(11.63)  | 6<br>(15.79)  | 15<br>(21.74) |
| <b>Total†</b>    | 64<br>(59.81) | 43<br>(40.19) | 38<br>(35.51) | 69<br>(64.49) | <b>Total†</b>             | 64<br>(59.81) | 43<br>(40.19) | 38<br>(35.51) | 69<br>(64.49) |
| <b>HR+/HER2+</b> |               |               |               |               |                           |               |               |               |               |
| <b>pCR*</b>      | 14<br>(41.18) | 9<br>(28.13)  | 13<br>(48.15) | 10<br>(25.64) | <b>Ki-67 response*</b>    | 22<br>(64.71) | 20<br>(62.50) | 20<br>(74.07) | 22<br>(56.41) |
| <b>No pCR*</b>   | 19<br>(55.88) | 23<br>(71.88) | 13<br>(48.15) | 29<br>(74.36) | <b>No Ki-67 response*</b> | 4<br>(11.76)  | 10<br>(31.25) | 4<br>(14.81)  | 10<br>(25.64) |
| <b>Missing*</b>  | 1<br>(2.94)   | 0<br>-        | 1<br>(3.70)   | 0<br>-        | <b>Missing*</b>           | 8<br>(23.53)  | 2<br>(6.25)   | 3<br>(11.11)  | 7<br>(17.95)  |
| <b>Total†</b>    | 34<br>(51.52) | 32<br>(48.48) | 27<br>(40.91) | 39<br>(59.09) | <b>Total†</b>             | 34<br>(51.52) | 32<br>(48.48) | 27<br>(40.91) | 39<br>(59.09) |
| <b>HR-/HER2-</b> |               |               |               |               |                           |               |               |               |               |
| <b>pCR*</b>      | 5<br>(27.78)  | 0<br>-        | 2<br>(66.67)  | 3<br>(13.64)  | <b>Ki-67 response*</b>    | 11<br>(61.11) | 2<br>(28.57)  | 2<br>(66.67)  | 11<br>(50.00) |
| <b>No pCR*</b>   | 13<br>(72.22) | 6<br>(85.71)  | 1<br>(33.33)  | 18<br>(81.82) | <b>No Ki-67 response*</b> | 7<br>(38.89)  | 4<br>(57.14)  | 1<br>(33.33)  | 10<br>(45.45) |
| <b>Missing*</b>  | 0<br>-        | 1<br>(14.29)  | 0<br>-        | 1<br>(4.55)   | <b>Missing*</b>           | 0<br>-        | 1<br>(14.29)  | 0<br>-        | 1<br>(4.55)   |
| <b>Total†</b>    | 18<br>(72.00) | 7<br>(28.00)  | 3<br>(12.00)  | 22<br>(88.00) | <b>Total†</b>             | 18<br>(72.00) | 7<br>(28.00)  | 3<br>(12.00)  | 22<br>(88.00) |
| <b>HR-/HER2+</b> |               |               |               |               |                           |               |               |               |               |
| <b>pCR*</b>      | 9<br>(75.00)  | 0<br>-        | 5<br>(62.50)  | 4<br>(50.00)  | <b>Ki-67 response*</b>    | 3<br>(25.00)  | 1<br>(25.00)  | 3<br>(37.50)  | 1<br>(12.50)  |
| <b>No pCR*</b>   | 3<br>(25.00)  | 4<br>(100.00) | 3<br>(37.50)  | 4<br>(50.00)  | <b>No Ki-67 response*</b> | 1<br>(8.33)   | 1<br>(25.00)  | 2<br>(25.00)  | 0<br>-        |
| <b>Missing*</b>  | 0<br>-        | 0<br>-        | 0<br>-        | 0<br>-        | <b>Missing*</b>           | 8<br>(66.67)  | 2<br>(50.00)  | 3<br>(37.50)  | 7<br>(87.50)  |
| <b>Total†</b>    | 12<br>(75.00) | 4<br>(25.00)  | 8<br>(50.00)  | 8<br>(50.00)  | <b>Total†</b>             | 12<br>(75.00) | 4<br>(25.00)  | 8<br>(50.00)  | 8<br>(50.00)  |

\*Rates of pCR, no pCR and patients with missing data among the patients with and without imaging response; †Share of patients with and without imaging response.

ECR, early clinical response.

**Supplementary Table 2: Area under curve, sensitivity and specificity for combined assessments relative to US**

| Definition of response                |      | Overall | HR+/HER2+ | HR-/HER2- | HR-/HER2+ |
|---------------------------------------|------|---------|-----------|-----------|-----------|
| <b>Ki-67 combined with US</b>         |      |         |           |           |           |
| ECR by both tests                     | AUC  | 0.6187  | 0.5715    | 0.6783    | 0.7033    |
|                                       | SENS | 0.433   | 0.3898    | 0.3750    | 0.7143    |
|                                       | SPEC | 0.8044  | 0.7532    | 0.9815    | 0.6923    |
| ECR by at least one test              | AUC  | 0.6041  | 0.5746    | 0.6551    | 0.6539    |
|                                       | SENS | 0.866   | 0.8644    | 0.7917    | 1.0000    |
|                                       | SPEC | 0.3422  | 0.2848    | 0.5185    | 0.3077    |
| ECR by US only (reference)            | AUC  | 0.5838  | 0.5400    | 0.6320    | 0.6621    |
|                                       | SENS | 0.4742  | 0.4407    | 0.3750    | 0.7857    |
|                                       | SPEC | 0.6933  | 0.6392    | 0.8889    | 0.5385    |
| <b>MRI combined with US</b>           |      |         |           |           |           |
| ECR by both tests                     | AUC  | 0.6513  | 0.6144    | 0.6000    | 0.6350    |
|                                       | SENS | 0.4054  | 0.3478    | 0.4000    | 0.5556    |
|                                       | SPEC | 0.8971  | 0.8810    | 1.0000    | 0.7143    |
| ECR by at least one test              | AUC  | 0.6151  | 0.5916    | 0.6316    | 0.7143    |
|                                       | SENS | 0.8919  | 0.8261    | 1.0000    | 1.0000    |
|                                       | SPEC | 0.3382  | 0.3571    | 0.2632    | 0.4286    |
| ECR by US only (reference)            | AUC  | 0.6453  | 0.6279    | 0.6737    | 0.5635    |
|                                       | SENS | 0.5405  | 0.5652    | 0.4000    | 0.5556    |
|                                       | SPEC | 0.7500  | 0.6905    | 0.9474    | 0.5714    |
| <b>MRI and Ki-67 combined with US</b> |      |         |           |           |           |
| ECR by each test                      | AUC  | 0.6322  | 0.5497    | 0.6000    | 0.7500    |
|                                       | SENS | 0.3333  | 0.2105    | 0.4000    | 1.0000    |
|                                       | SPEC | 0.9310  | 0.8889    | 1.0000    | 1.0000    |
| ECR by at least one test              | AUC  | 0.5406  | 0.5307    | 0.5790    | 0.5000    |
|                                       | SENS | 0.9259  | 0.8947    | 1.0000    | 1.0000    |
|                                       | SPEC | 0.1552  | 0.1667    | 0.1579    | 0.0000    |
| ECR by US only (reference)            | AUC  | 0.6670  | 0.6228    | 0.6737    | 0.6667    |
|                                       | SENS | 0.5926  | 0.5789    | 0.40000   | 1.0000    |
|                                       | SPEC | 0.7414  | 0.6667    | 0.9474    | 0.3333    |

SENS, Sensitivity, defined as  $P(R=1|pCR=1)$ ; SPEC, Specificity, defined as  $P(R=0|pCR=0)$  where  $P(A|B)$  denotes the conditional probability of event A given that event B has occurred and R is a placeholder for ECR or Ki-67 response. AUC, area under the receiver operating characteristic curve; ECR, early clinical response.
